# Supplementary material for: Shaping Neonatal Immunization by Tuning the Delivery of Synergistic Adjuvants via Nanocarriers
Source: PubMed Central journal article supplement — ACS Chem Biol. 2022 Aug 26;17(9):2559–71. doi: 10.1021/acschembio.2c00497 (PMC9486804; doi:10.1021/acschembio.2c00497), 2022-08-26
Supplement: cb2c00497_si_001.pdf [file cb2c00497_si_001.pdf]

## SUPPORTING INFORMATION

### **Shaping neonatal immunization by tuning delivery of synergistic adjuvants via nanocarriers**

Soumik Barman<sup>1,2</sup>, Francesco Borriello<sup>1,2,3,4,ω,†</sup>, Byron Brook<sup>1,2,†</sup>, Carlo Pietrasanta<sup>1,2,5,6,†</sup>, Maria De Leon<sup>1</sup>, Cali Sweitzer<sup>1</sup>, Manisha Menon<sup>1</sup>, Simon D. van Haren<sup>1,2</sup>, Dheeraj Soni<sup>1,2</sup>, Yoshine Saito<sup>1</sup>, Etsuro Nanishi<sup>1,2</sup>, Sijia Yi<sup>7#</sup>, Sharan Bobbala<sup>8</sup>, Ofer Levy<sup>1,2,9</sup>, Evan A. Scott<sup>7,φ,\*\*</sup>, David J. Dowling<sup>1,2,φ,\*\*</sup>

<sup>1</sup>*Precision Vaccines Program*, Division of Infectious Diseases, Boston Children's Hospital, Boston, MA 02115, USA, <sup>2</sup>Harvard Medical School, Boston, MA 02115, USA, <sup>3</sup>Department of Translational Medical Sciences and Center for Basic and Clinical Immunology Research (CISI), University of Naples Federico II, Naples 80131, Italy <sup>4</sup>WAO Center of Excellence, Naples 80131, Italy, <sup>5</sup>Fondazione IRCCS Ca' Granda Ospedale Maggiore Policlinico, NICU, Milan 20122, Italy, <sup>6</sup>Department of Clinical Sciences and Community Health, University of Milan, Milan 20122, Italy, <sup>7</sup>Department of Biomedical Engineering, Northwestern University, Evanston, IL 60208, USA, <sup>8</sup>Department of Pharmaceutical Sciences, School of Pharmacy, West Virginia University, Morgantown, WV 26506, USA, <sup>9</sup>Broad Institute of MIT & Harvard, Cambridge, MA 02142, USA

<sup>ω</sup>Current Address: Generate Biomedicines (Cambridge, MA 02139, USA)

<sup>#</sup>Current Address: Merck, Pennsylvania (Lansdale, PA 19446, USA)

<sup>†</sup> F.B., B.B. and C.P. contributed equally to this work.

<sup>φ</sup> E.A.S. and D.J.D. contributed equally to this work.

<sup>\*\*</sup> Correspondence: E.A.S. [evan.scott@northwestern.edu] and D.J.D. [david.dowling@childrens.harvard.edu]

## INDEX

| <b>Supplementary Figures</b> |                                                                                                                                                                                | <b>Page</b> |
|------------------------------|--------------------------------------------------------------------------------------------------------------------------------------------------------------------------------|-------------|
| Figure S1                    | Comparison of rHA specific humoral and cell-mediated responses in between co-encapsulation and individual encapsulation of cGAMP and CL075 in PEG- <i>b</i> -PPS nanocarriers. | S-3         |
| Figure S2                    | Gating strategy to identify rHA-specific CD8 <sup>+</sup> T cells.                                                                                                             | S-4         |
| Figure S3                    | Gating strategy to identify rHA-specific CD4 <sup>+</sup> T cells and it's multifunctionality.                                                                                 | S-5         |
| Figure S4                    | cGAMP and CL075 encapsulating PS promotes T <sub>FH</sub> and B cell responses in draining lymph nodes (DLN).                                                                  | S-6         |
| Figure S5                    | Comparison of rHA specific humoral and cell mediated responses in between different formulations.                                                                              | S-7         |

  

| <b>Supplementary Tables</b> |                                                | <b>Page</b> |
|-----------------------------|------------------------------------------------|-------------|
| Table S1                    | Vaccine formulations for <i>in vivo</i> study. | S-8         |
| Table S2                    | Panels and regents for flow cytometry assay.   | S-9         |

## Supplementary Figures

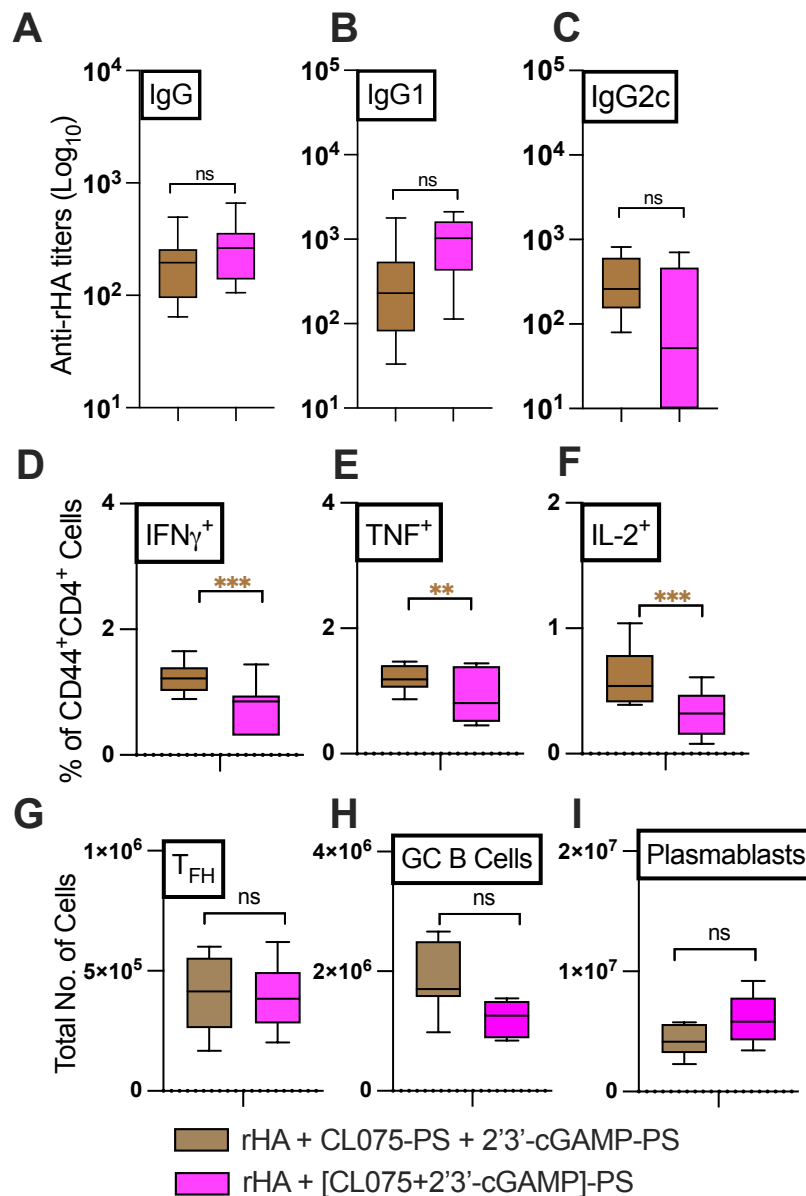

**Figure S1. Comparison of rHA specific humoral and cell-mediated responses in between co-encapsulation and individual encapsulation of cGAMP and CL075 in PEG-*b*-PPS nanocarriers.** After immunization of infant C57BL/6 mice i.m. on DOL (day of life) 7 and 14, antibody titers for rHA-specific IgG (A), IgG1(B) and IgG2c (C) were determined by ELISA in serum samples collected at DOL 21. (D-F) Splenic CD4<sup>+</sup> T cell responses after rHA stimulation. (G-I) Total number of T<sub>FH</sub> cells (CD3<sup>+</sup>CD4<sup>+</sup>PD-1<sup>+</sup>CXCR5<sup>+</sup>), GC B cells (CD3<sup>+</sup>CD19<sup>+</sup>CD95<sup>+</sup>GL7<sup>+</sup>), plasmablasts (CD3<sup>+</sup>CD19<sup>+</sup>CD138<sup>+</sup>) in DLN. Statistical comparison was performed either using one-way ANOVA or nonparametric Kruskal-Wallis test corrected for multiple comparisons; ns denoted non-significant, \*\* $p < 0.002$ , \*\*\* $p < 0.001$  ( $n = 5 - 7$  per group), with comparison to PBS, rHA and/or mock loaded PS nanocarriers control or test groups. Study was inclusive of two independent repeats.

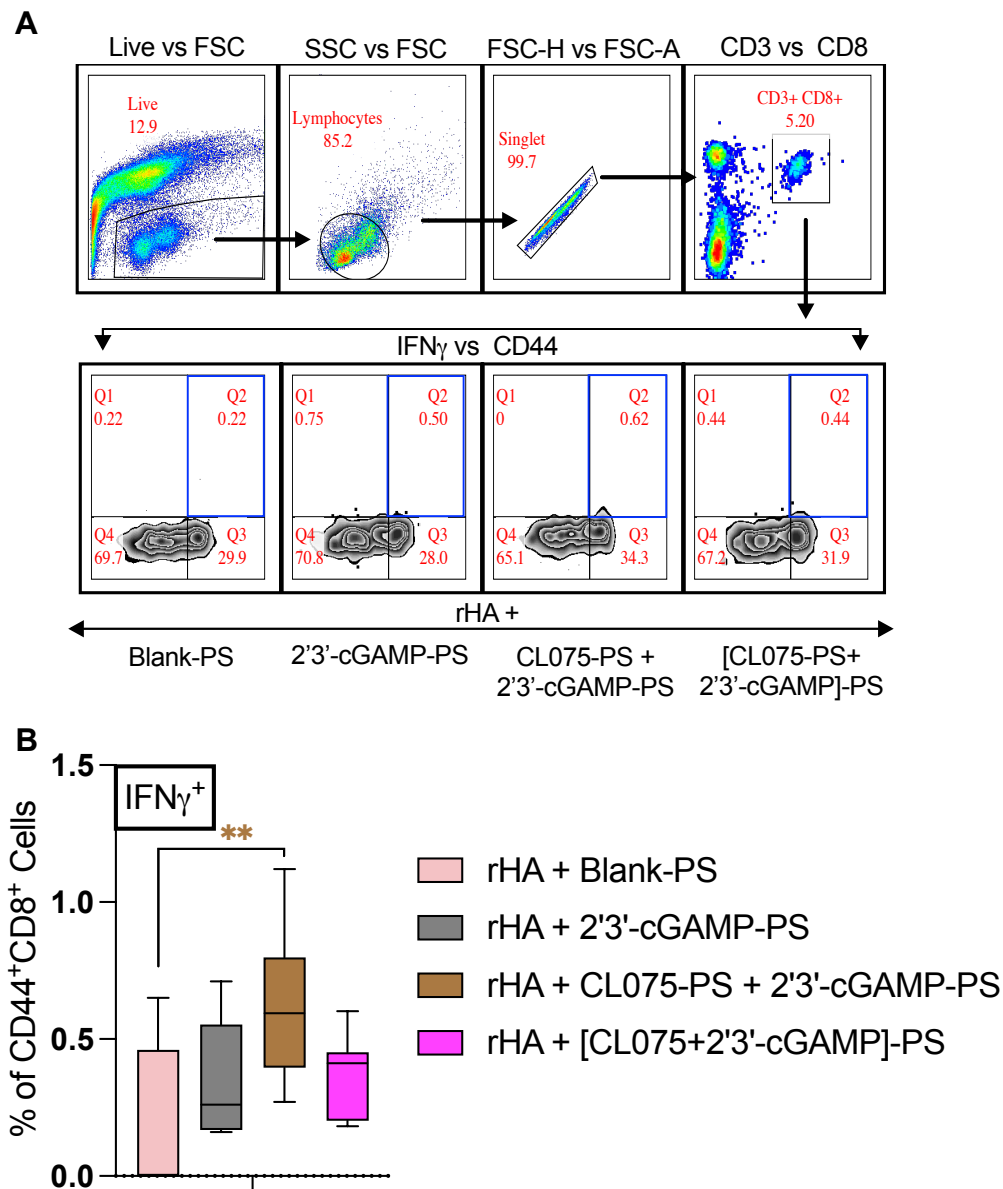

**Figure S2. Gating strategy to identify rHA-specific CD8<sup>+</sup> T cells.** (A) Splenocytes were isolated from immunized mice following 12 days booster. Antigen-specific T cell responses following rHA stimulation were defined as CD3<sup>+</sup>CD8<sup>+</sup>CD44<sup>high</sup> IFN $\gamma$ <sup>+</sup> using FlowJo software, v.10.8.1. Shown is an example of the hierarchical gating strategy leading to the identification of live, singlet, CD3<sup>+</sup>, CD4<sup>+</sup>, CD44<sup>high</sup> and IFN $\gamma$ <sup>+</sup> T cells in different immunize groups. (B) Splenic CD8<sup>+</sup> IFN $\gamma$ <sup>+</sup> T cell signature was analyzed from indicated immunized groups after 12 days booster. Statistical comparison was performed using nonparametric Kruskal-Wallis test followed by Dunn's multiple comparisons; \*\*p < 0.002 (n = 5 - 12 per group). Study was inclusive of two independent repeats.

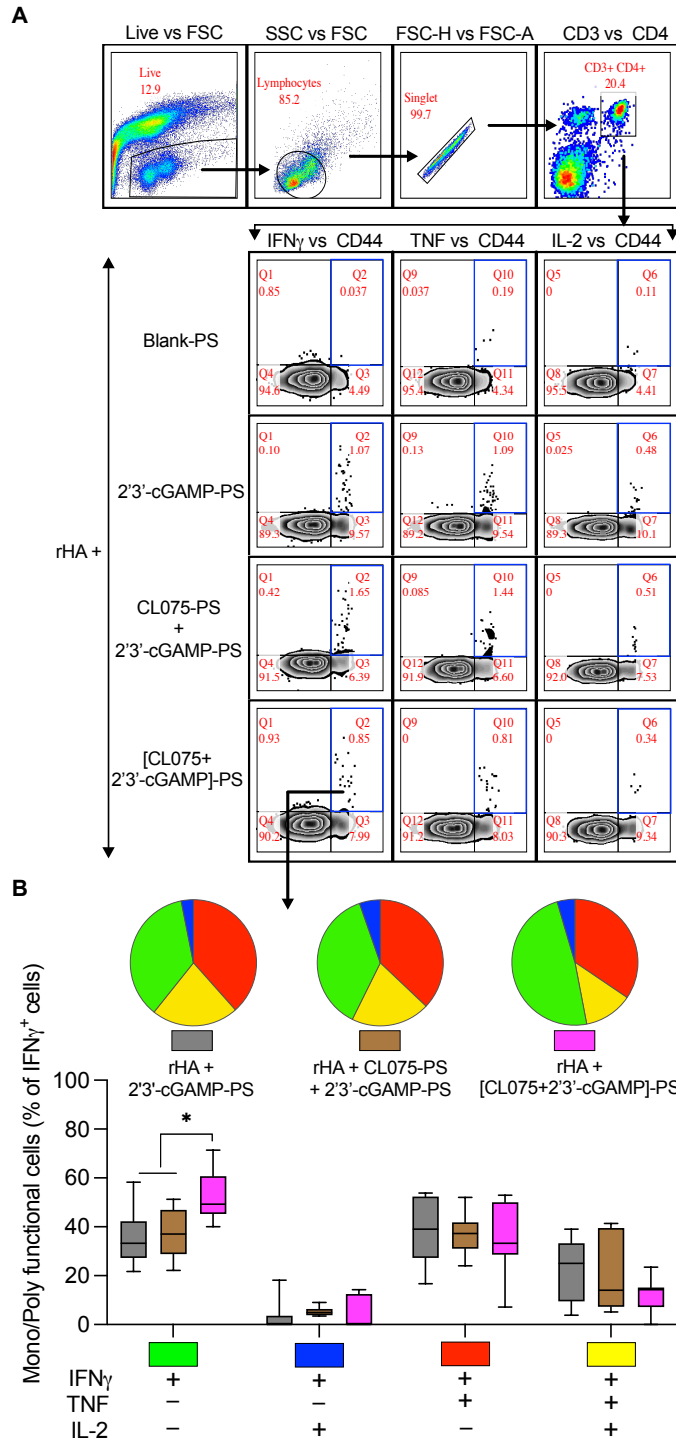

**Figure S3. Gating strategy to identify rHA-specific CD4<sup>+</sup> T cells and its multifunctionality.** (A) Splenocytes were isolated from immunized mice following 12 days booster. Antigen-specific T cell responses following rHA stimulation were defined as CD3<sup>+</sup>CD4<sup>+</sup>CD44<sup>high</sup> cytokine<sup>+</sup> using FlowJo software, v.10.8.1. Shown is an example of the hierarchical gating strategy leading to the identification of live, singlet, CD3<sup>+</sup>, CD4<sup>+</sup>, CD44<sup>high</sup> and cytokine<sup>+</sup> T cells with an example for IFN $\gamma$ , TNF and IL-2 responses in different immunized groups. (B) Multifunctionality of the CD4<sup>+</sup> IFN $\gamma$ <sup>+</sup> T cells cytokine responses was analyzed from indicated immunized groups after 12 days booster. Pie chart represents the fraction of the total CD4<sup>+</sup> IFN $\gamma$ <sup>+</sup> cytokines response comprising any combination of TNF and IL-2 production after Flublok stimulation in different immunized groups. Beneath pie chart, bar graph represents the frequencies of multifunctional T cells in CD4<sup>+</sup> IFN $\gamma$ <sup>+</sup> T cell compartment. Statistical comparison was performed either using one-way ANOVA or nonparametric Kruskal-Wallis test corrected for multiple comparisons; \*p < 0.033 (n = 5 - 12 per group). Study was inclusive of two independent repeats.

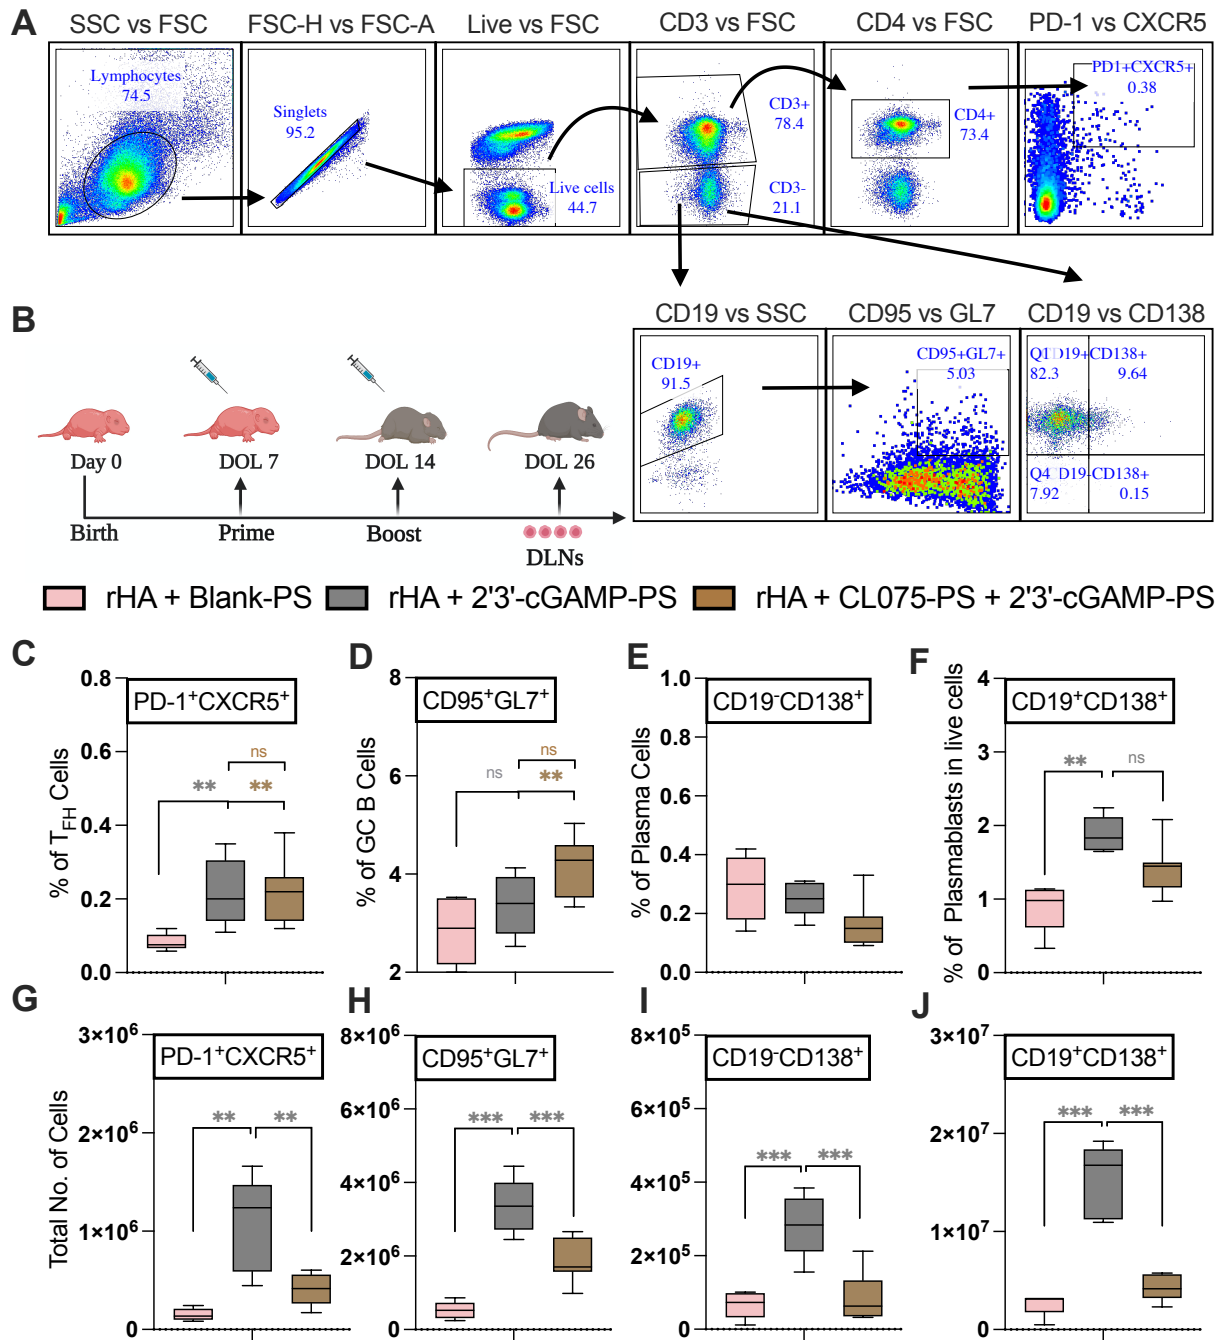

**Figure S4. cGAMP and CL075 encapsulating PS promotes  $T_{FH}$  and B cell responses in draining lymph nodes (DLN).** (A) Shown is an example of the hierarchical gating strategy leading to the identification of  $T_{FH}$  cells (CD3<sup>+</sup>CD4<sup>+</sup>PD-1<sup>+</sup>CXCR5<sup>+</sup>), GC B cells (CD3<sup>-</sup>CD19<sup>+</sup>CD95<sup>+</sup>GL7<sup>+</sup>), plasmablasts (CD3<sup>-</sup>CD19<sup>+</sup>CD138<sup>+</sup>) and plasma cells (CD3<sup>-</sup>CD19<sup>-</sup>CD138<sup>+</sup>). (B) Infant C57BL/6 were immunized i.m. as described in Figure 4. Lymphocytes from DLN (both popliteal and inguinal) of immunized mice were harvested at DOL 26 for FACS analysis. (C) % of  $T_{FH}$  cells, (D) % of GC B cells, (E) % of Plasma cells and (F) % of plasmablasts among live cells. (G-J) Total number of immune subsets in DLN. Statistical comparison was performed either using one-way ANOVA or nonparametric Kruskal-Wallis test corrected for multiple comparisons; \*\* $p < 0.002$ , \*\*\* $p < 0.001$  ( $n = 5 - 7$  per group). Study was inclusive of two independent repeats.

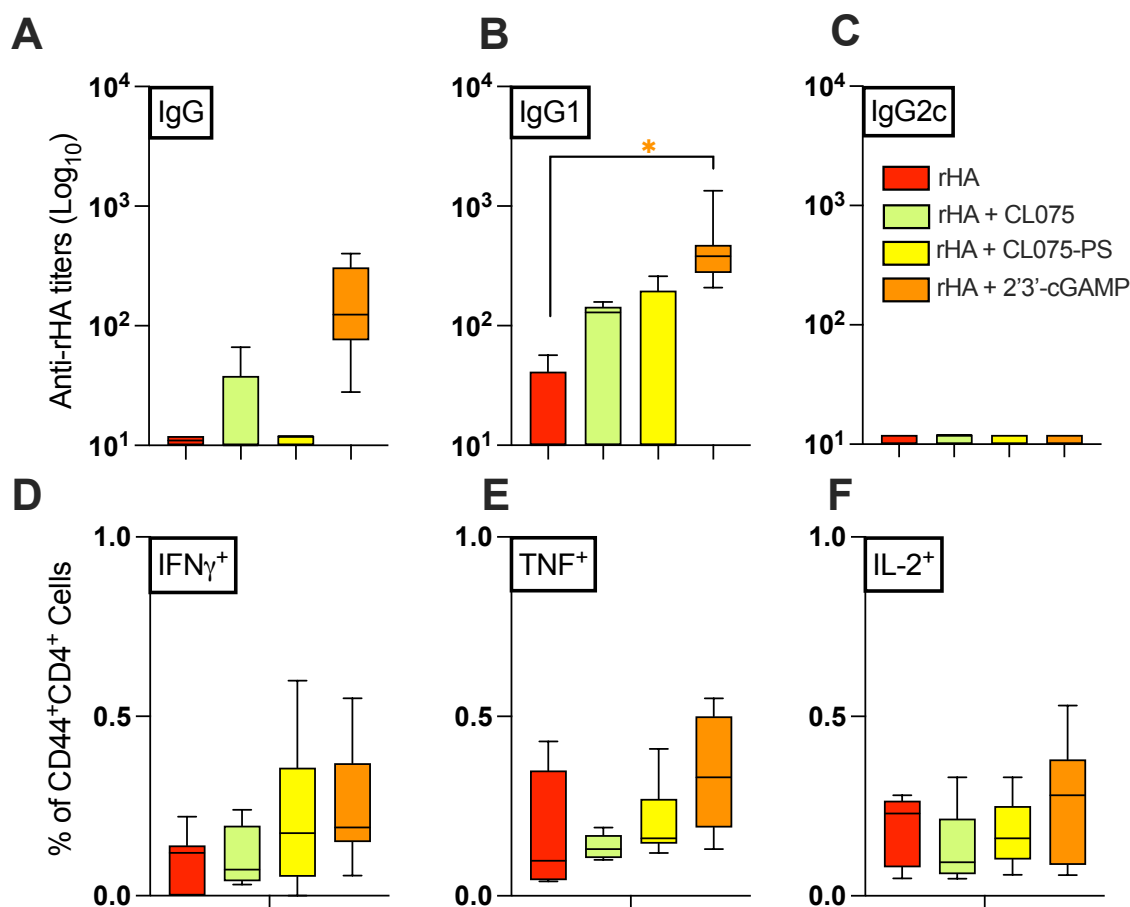

**Figure S5. Comparison of rHA specific humoral and cell mediated responses in between different formulations.** After immunization of infant C57BL/6 mice i.m. on DOL 7 and 14, antibody titers for rHA-specific IgG (A), IgG1(B) and IgG2c (C) were determined by ELISA in serum samples collected at DOL 21. (D-F) Splenic CD4<sup>+</sup> T cell responses after rHA stimulation was determined by flow cytometry. Statistical comparison was performed either using one-way ANOVA or nonparametric Kruskal-Wallis test corrected for multiple comparisons; \*p < 0.033 (n = 5 - 12 per group). Study was inclusive of two independent repeats.

### Supplementary Table 1: Vaccine formulations for *in vivo* study.

For the (rHA+Blank-PS) group, PS content was maintained at 400 µg to match the PS content of admixture group, i.e. rHA+CL075-PS+2'3'-cGAMP-PS.

| Group                    | rHA<br>(Flublok® Quadrivalent<br>2020-2021) | 2'3'-cGAMP<br>(µg) | CL075<br>(µM) | PS<br>(µg) |
|--------------------------|---------------------------------------------|--------------------|---------------|------------|
| PBS                      | --                                          | --                 | --            | --         |
| Blank-PS                 | 4µg (1µg of each variant)                   | --                 | --            | 400 µg     |
| CL075                    | 4µg (1µg of each variant)                   | --                 | 164 µM        | --         |
| 2'3'-cGAMP               | 4µg (1µg of each variant)                   | 1µg                | --            | --         |
| CL075+2'3'-cGAMP         | 4µg (1µg of each variant)                   | 1µg                | 164 µM        | --         |
| CL075-PS                 | 4µg (1µg of each variant)                   | --                 | 164 µM        | 200 µg     |
| 2'3'-cGAMP-PS            | 4µg (1µg of each variant)                   | 1µg                | --            | 200 µg     |
| CL075-PS + 2'3'-cGAMP-PS | 4µg (1µg of each variant)                   | 1µg                | 164 µM        | 400 µg     |
| [CL075+2'3'-cGAMP]-PS    | 4µg (1µg of each variant)                   | 1µg                | 164 µM        | 200 µg     |



## Supplementary Table 2:

Panels and reagents for flow cytometry assay.

| Assay                               | Target        | Clone    | Fluorochrome                          | Vendor         | Identifier | Titer  |
|-------------------------------------|---------------|----------|---------------------------------------|----------------|------------|--------|
| T-Cell<br>Cytokines<br>(Human)      | Viability     | ---      | eFlour780                             | eBioscience    | 65-0865    | 1:1000 |
|                                     | CD3           | UCHT1    | PerCP-Cy5.5                           | BioLegend      | 300430     | 1:40   |
|                                     | CD4           | RPA-T4   | PE                                    | BioLegend      | 300508     | 1:40   |
|                                     | CD8           | RPA-T8   | PE-Dazzle 594                         | BioLegend      | 301057     | 1:40   |
|                                     | IL-4          | MP4-25D2 | BV421                                 | BioLegend      | 500826     | 1:40   |
|                                     | IL-17A        | N49-653  | Alexa Fluor 647                       | BD Biosciences | 560491     | 1:10   |
|                                     | IFN- $\gamma$ | B27      | Alexa Fluor 488                       | BD Biosciences | 557718     | 1:40   |
| Assay                               | Target        | Clone    | Fluorochrome                          | Vendor         | Identifier | Titer  |
| T-Cell<br>Cytokines<br>(Mice)       | Viability     | ---      | Brilliant Violet 510                  | Invitrogen     | L34966     | 1:500  |
|                                     | CD3           | 17A2     | Brilliant Violet 785                  | BioLegend      | 100232     | 1:40   |
|                                     | CD4           | RM4-5    | APC/Fire 750                          | BioLegend      | 100568     | 1:160  |
|                                     | CD8           | 53-6.7   | Brilliant UltraViolet<br>395 (BUV395) | BD Biosciences | 563786     | 1:80   |
|                                     | CD44          | IM7      | PerCP-Cy5.5                           | BioLegend      | 103032     | 1:160  |
|                                     | IFN- $\gamma$ | XMG1.2   | Alexa Fluor 488                       | BioLegend      | 505813     | 1:160  |
|                                     | TNF           | MP6-XT22 | PE Cy7                                | BioLegend      | 506324     | 1:160  |
|                                     | IL-2          | JES6-5H4 | PE                                    | BioLegend      | 503808     | 1:40   |
| Assay                               | Target        | Clone    | Fluorochrome                          | Vendor         | Identifier | Titer  |
| DLNs<br>immunophenotyping<br>(Mice) | CD3           | 17A2     | BUV395                                | BD Biosciences | 612803     | 1:80   |
|                                     | PD-1          | 29F.1A12 | PE                                    | BioLegend      | 135206     | 1:40   |
|                                     | CXCR5         | L138D7   | Brilliant Violet 421                  | BioLegend      | 145512     | 1:40   |
|                                     | CD19          | 1D3/CD19 | FITC                                  | BioLegend      | 152404     | 1:320  |
|                                     | CD95          | Jo2      | PE Cy7                                | BD Biosciences | 557653     | 1:160  |
|                                     | GL7           | GL7      | Alexa Fluor 647                       | BioLegend      | 144606     | 1:80   |
|                                     | CD138         | 281-2    | Brilliant Violet 785                  | BioLegend      | 142534     | 1:80   |
